# Supplementary material
Source: PubMed Central journal article supplement (PMC524339)
Supplement: 7600402s3.pdf [file 7600402s3.pdf]

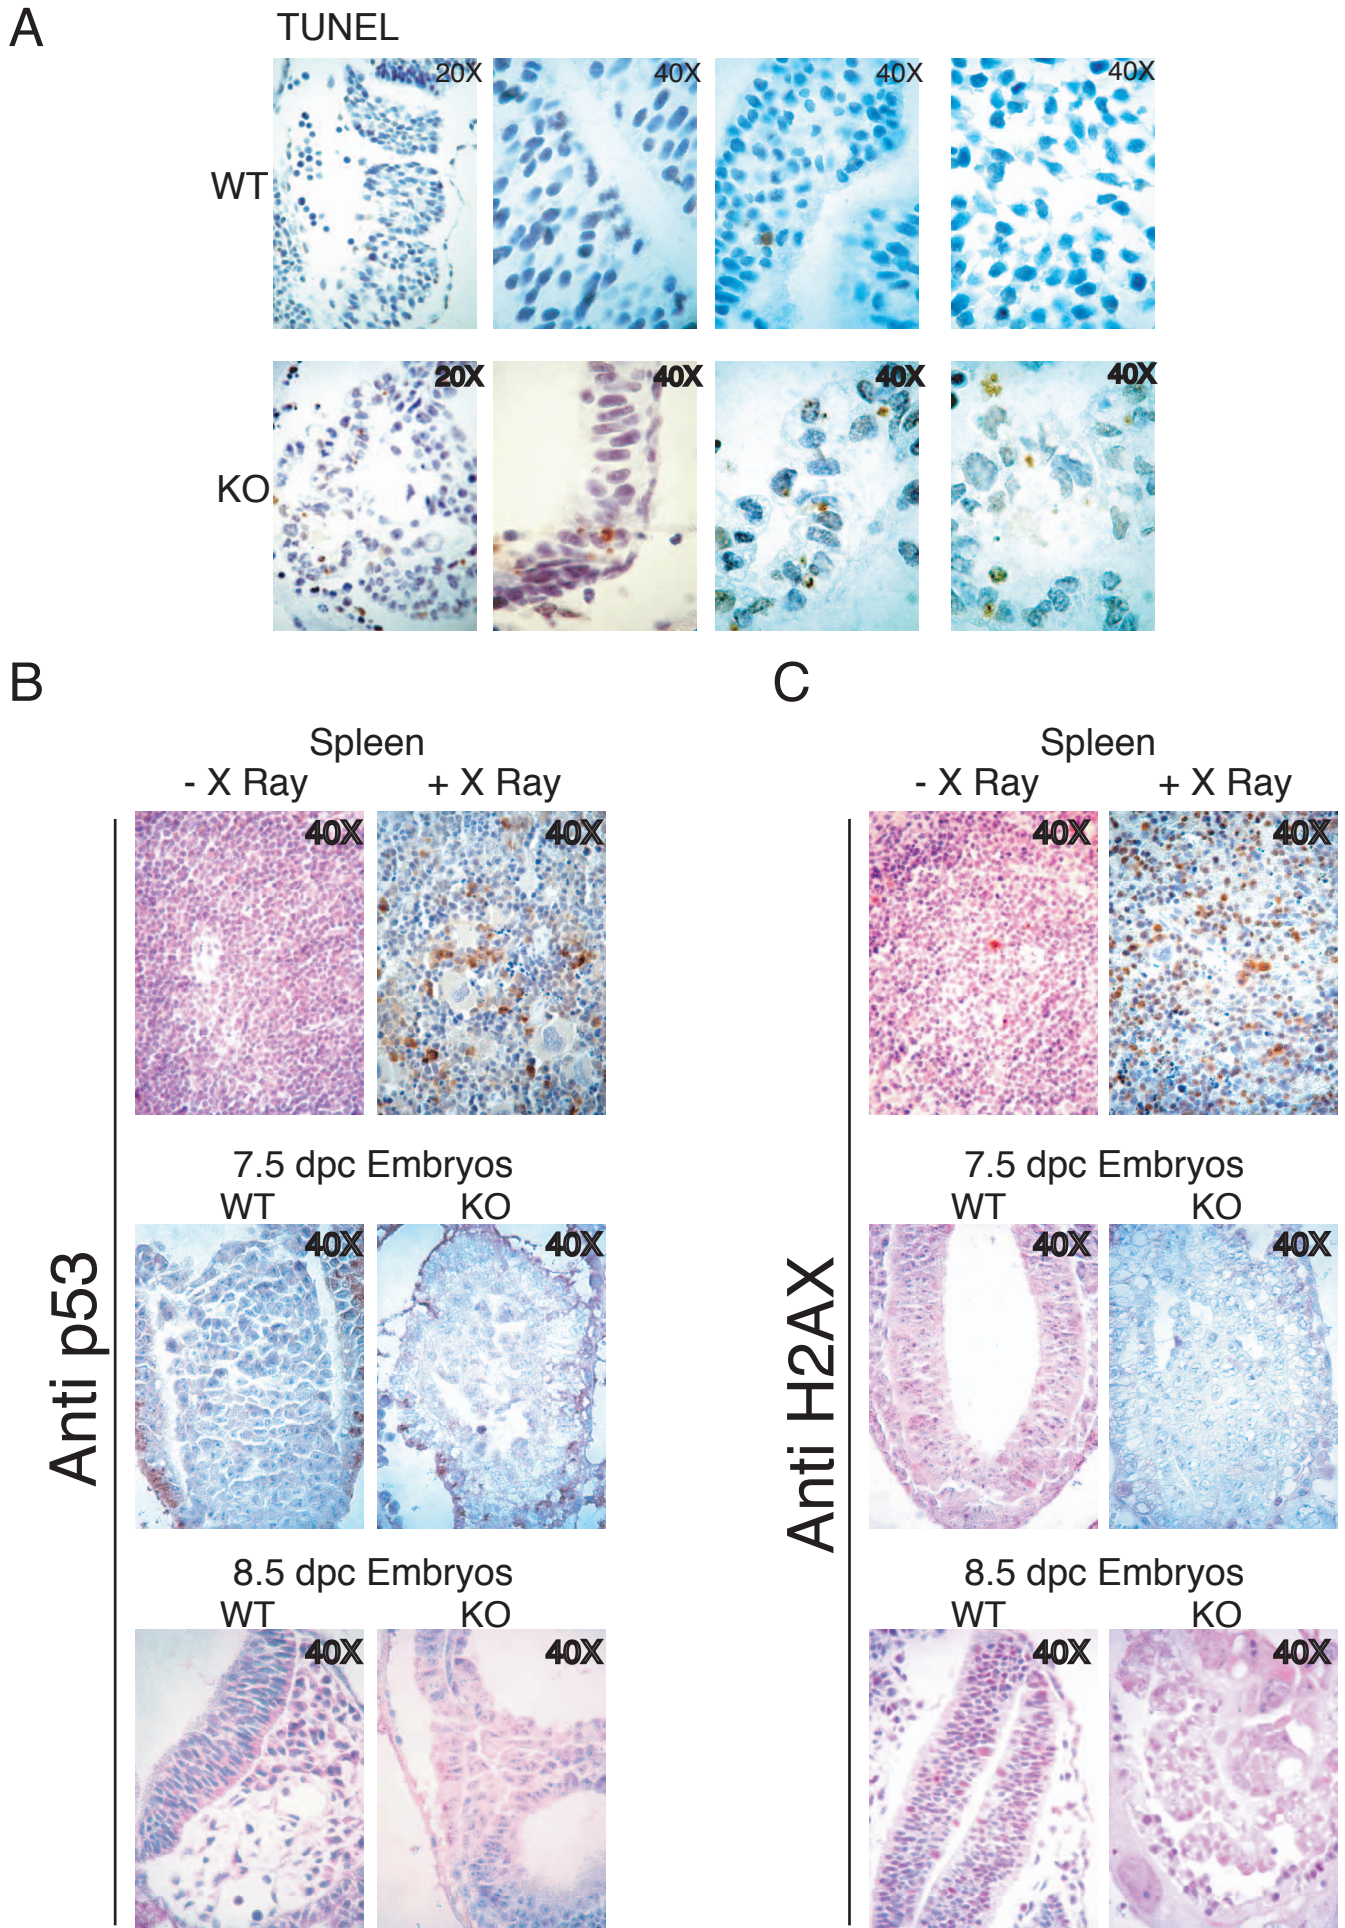

**Supplementary Figure 2. Increased apoptosis in *Suz12* KO embryos, but lack of a DNA damage response.**

**A:** Different magnifications of TUNEL staining in WT (top panels) and KO (bottom panels) 8.5 dpc embryos. **B and C:** IHC staining of p53 and H2AX in WT and KO 7.5 (middle panels) and 8.5 (bottom panels) dpc embryos, showing no activation of both p53 and H2AX in SUZ12 <sup>-/-</sup> embryos. Staining of irradiated (X-ray; collected 6 hours after 8 Gy treatment) and control spleens of adult mice (top panels) is presented as control for the specificity of the antibodies.
